# Supplementary material
Source: Springer Nature journal article supplement (https://www.springermedizin.de/resource/supplementary/12931_2013_1595_MOESM2_ESM.pdf/10243340)

A

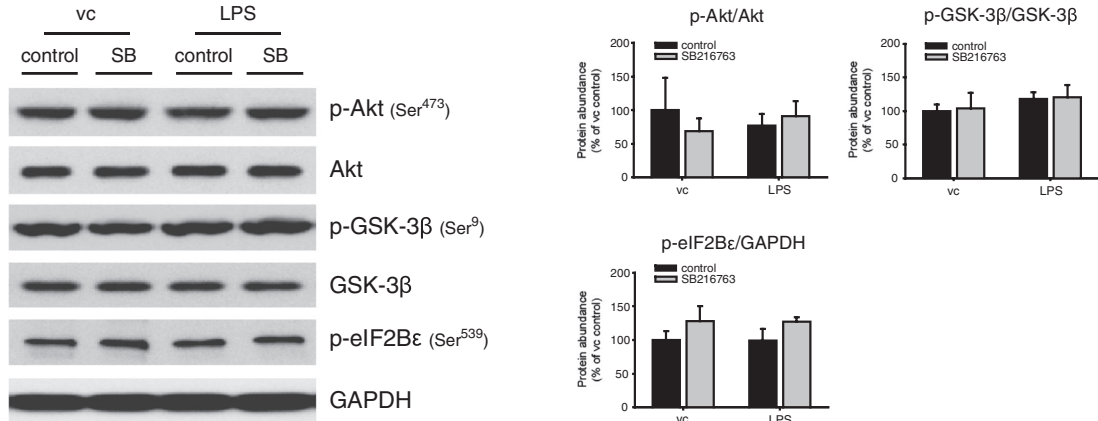

B

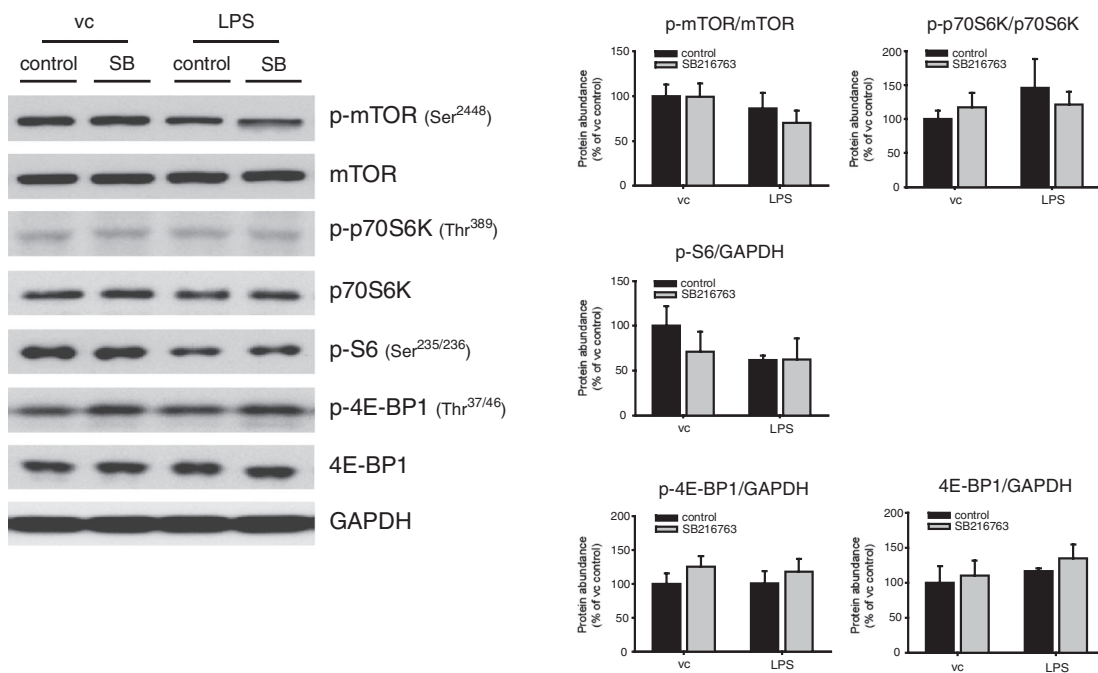

C

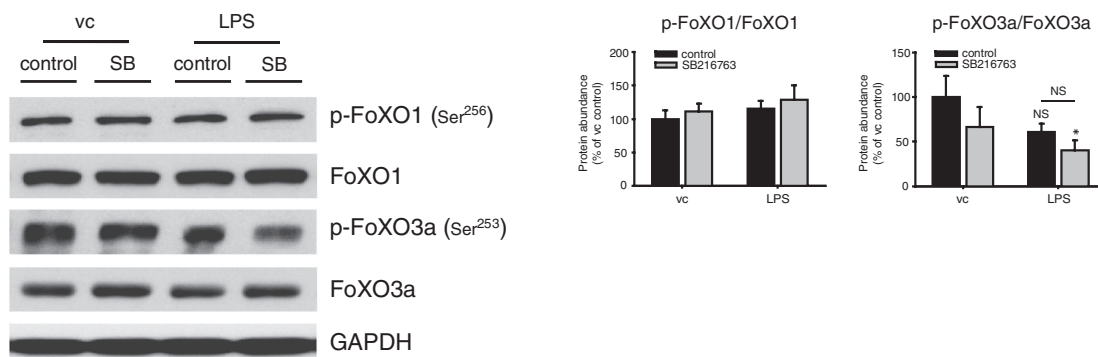

Supplement: MOESM2 [file 10243340]
